# Supplementary material for: Future increases in Amazonia water stress from CO2 physiology and deforestation
Source: Springer Nature journal article supplement (doi:10.1038/s44221-023-00128-y), 2023-08-31
Supplement: MOESM1 [file 44221_2023_128_MOESM1_ESM.pdf]

---

# Future increases in Amazonia water stress from CO<sub>2</sub> physiology and deforestation

---

In the format provided by the authors and unedited

---

## Supplementary Figures and Tables

7 figures, 3 tables

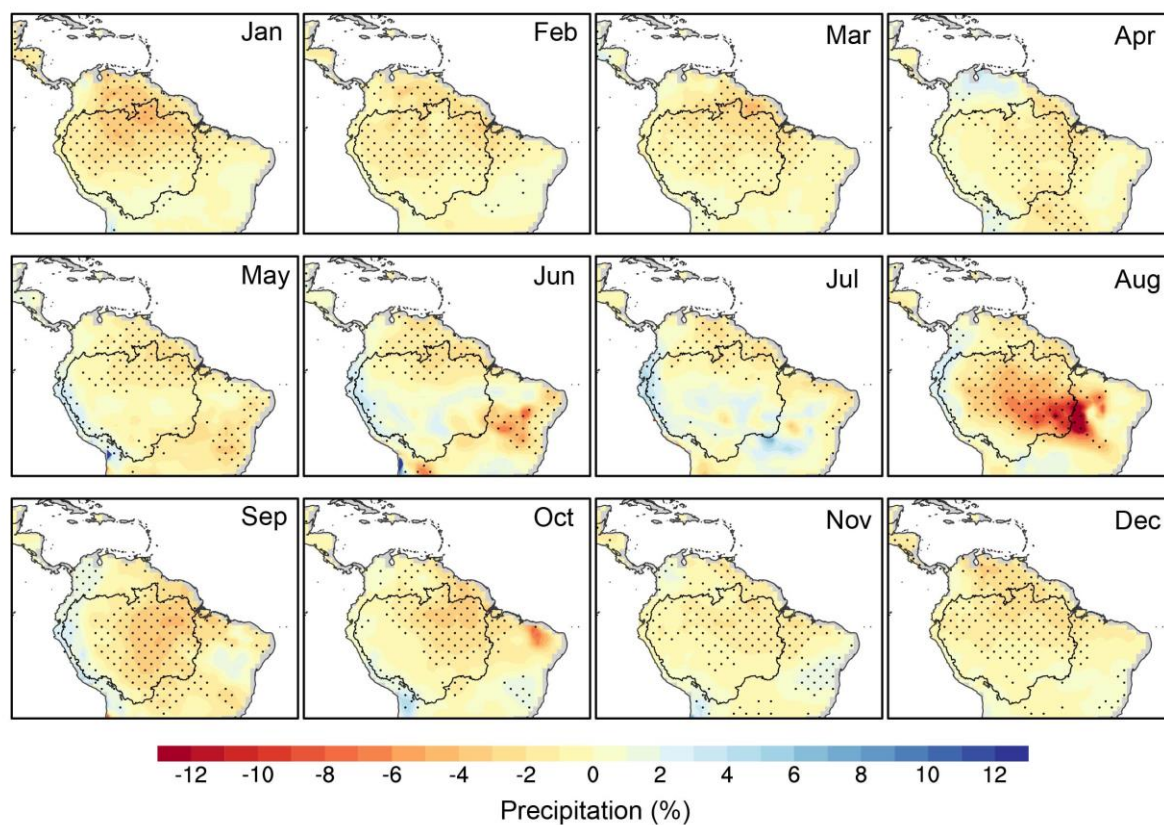

**Supplementary Fig. 1.** Intra-annual patterns of precipitation response to 100 ppm increase in  $\text{CO}_2$  concentration. For each month, linear regressions were performed for precipitation at each pixel against the atmospheric  $\text{CO}_2$  concentration from their 140-year simulations of the C4MIP experiments (see Methods). Dotted area indicates the model agreement, with at least six out of eight models agreeing on the sign of the precipitation response.

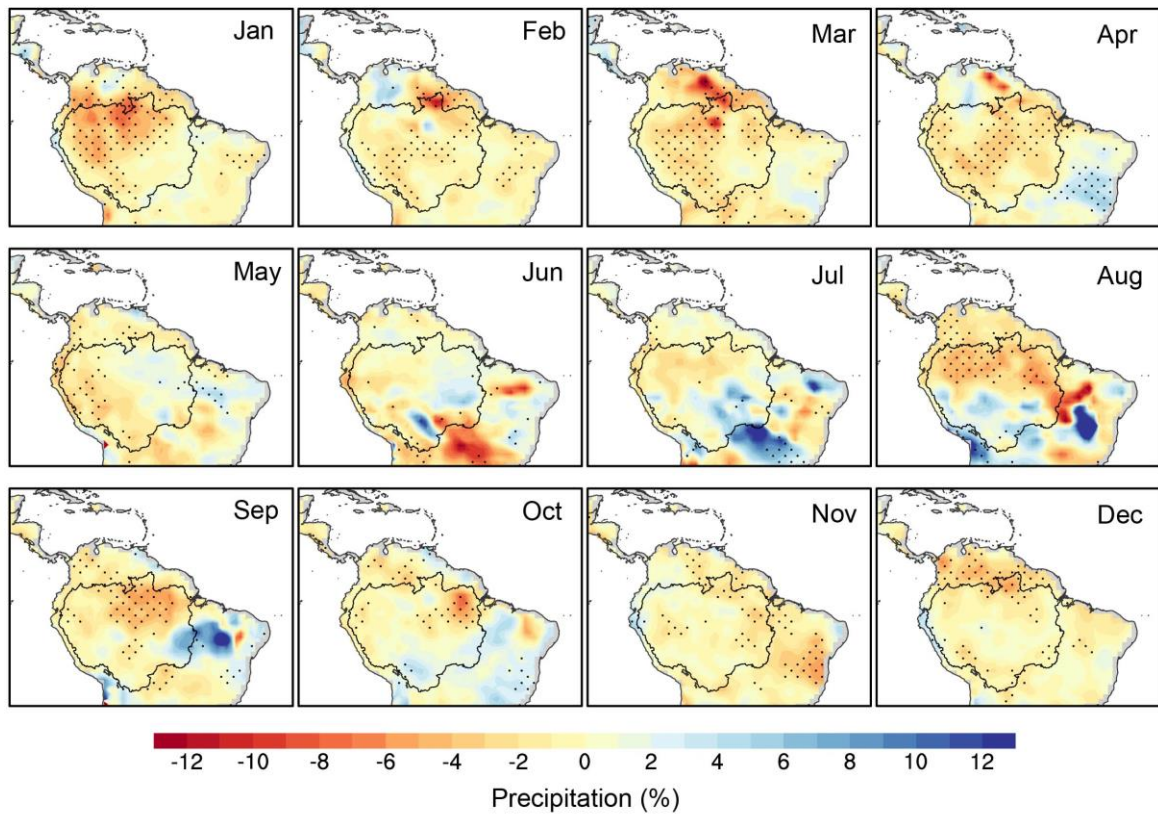

**Supplementary Fig. 2.** Intra-annual patterns of precipitation response to 10% deforestation in the Amazon basin. For each month, linear regressions were performed for precipitation at each pixel against the basin-scale average in deforestation fraction from their 50-year simulations of the LUMIP experiments (see Methods). Dotted area indicates the model agreement, with at least six out of eight models agreeing on the sign of the precipitation response.

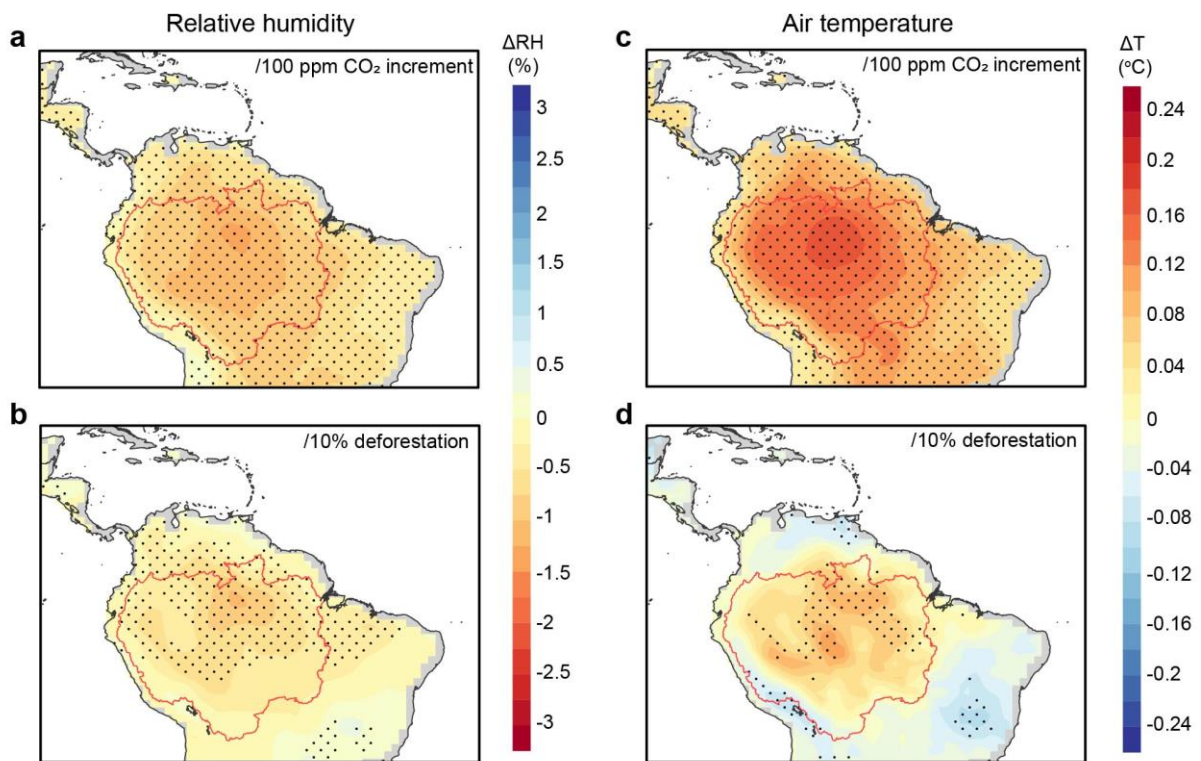

**Supplementary Fig. 3.** Same as Fig. 2 but for (a), (b) surface relative humidity (RH) and (c), (d) air temperature (T). Dotted area for (c), (d) indicates the model agreement, with at least six out of eight models agreeing on the sign of the multi-model average T response. Due to the limited model output for RH, the dotted area for (a), (b) indicates at least three out of available model output agreeing on the sign of the multi-model average RH response.

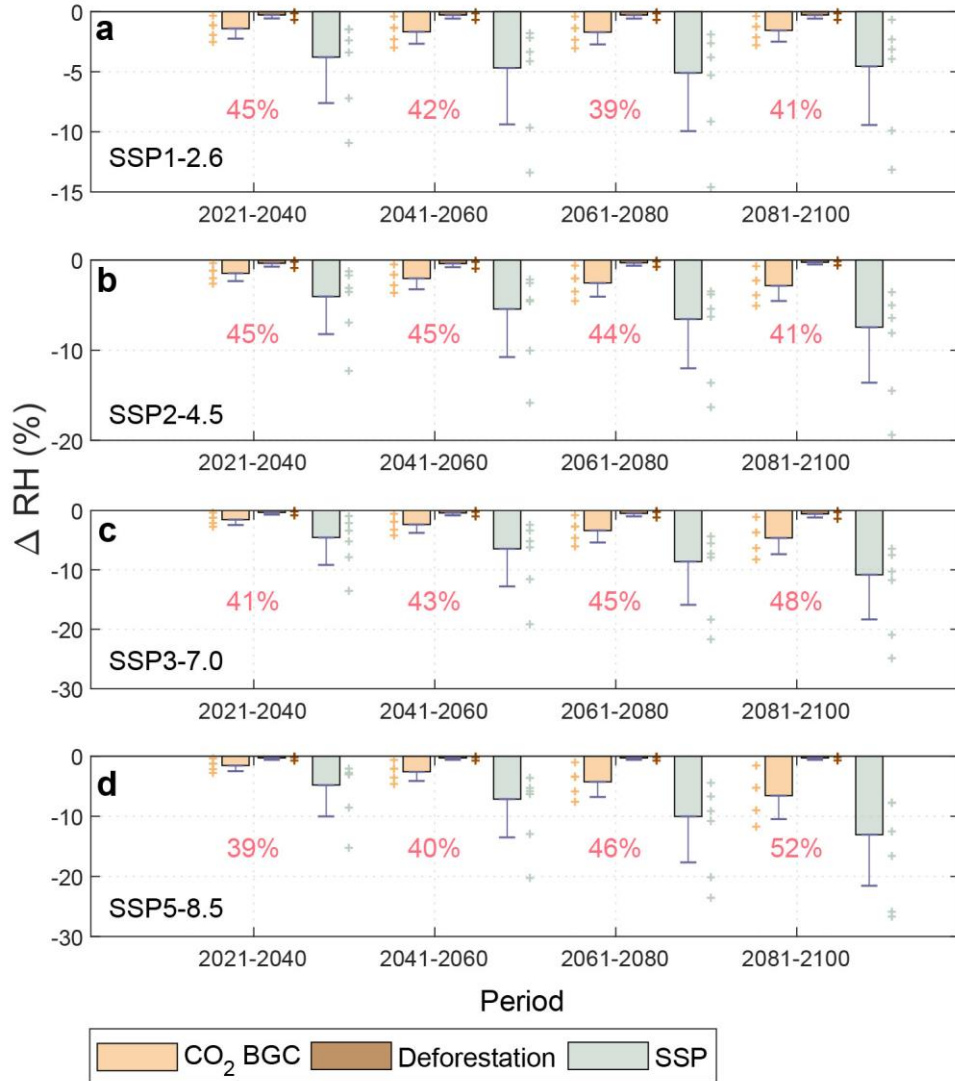

**Supplementary Fig. 4.** Same as Fig. 4 but for surface relative humidity (RH, %). Each error bar indicates 1 standard deviation (SD) being added to the mean values across the CMIP6 models with available output ( $n = 5$  for CO<sub>2</sub> physiology,  $n = 6$  for SSP simulation, and  $n = 4$  for deforestation). Data point for each model has been shown along with the bar as indicated by plus sign.

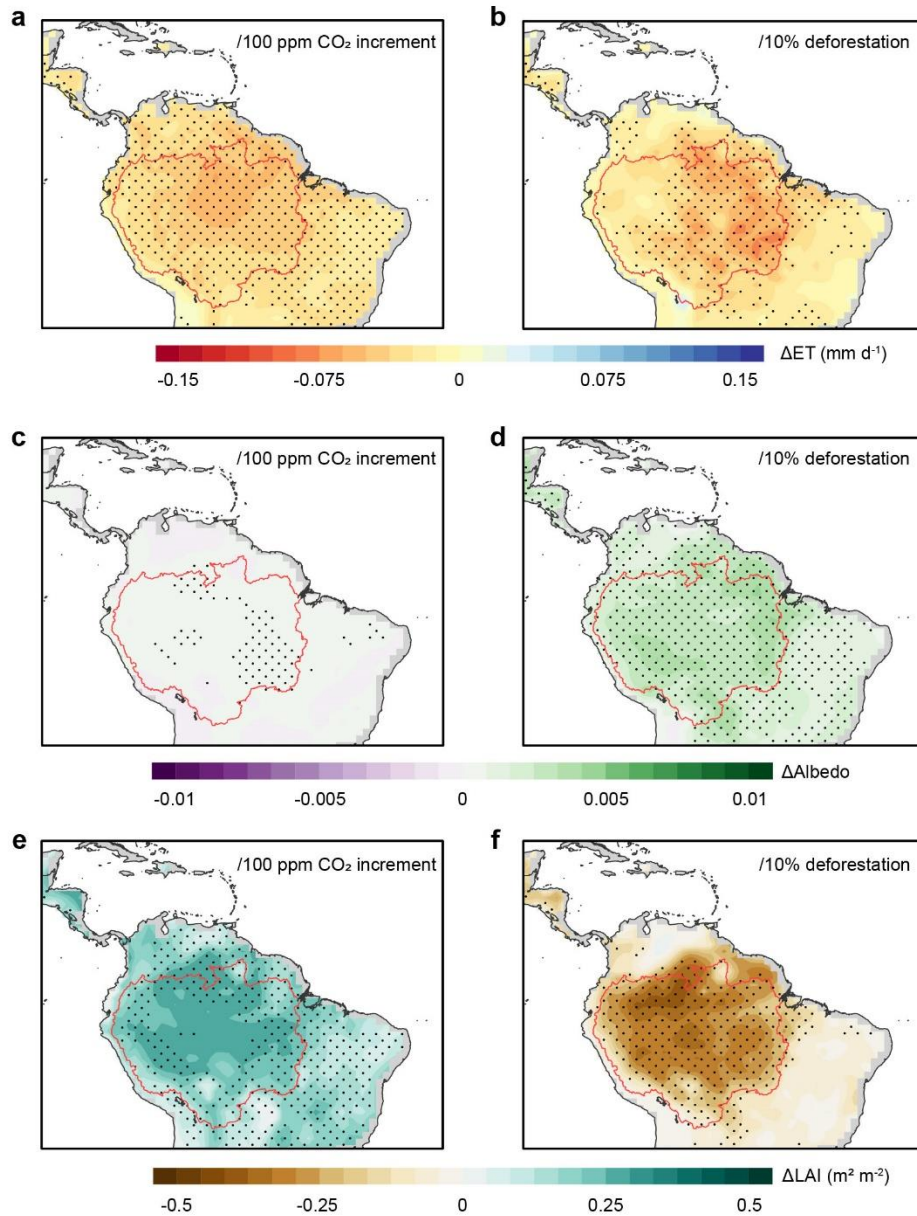

**Supplementary Fig. 5.** Same as Figure 2 but for three mechanism variables such as evapotranspiration (ET), surface albedo, and leaf area index (LAI) in response to either CO<sub>2</sub> physiological effects or deforestation in each idealized experiment. Dotted area indicates the model agreement, with at least six out of seven (a), six out of eight (b), six out of six (c), six out of seven (d), four out of five (e), and six out of seven (f) models agreeing on the sign of the multi-model mean mechanism variables response. ET is not available from IPSL-CM6A-LR in 1pctCO<sub>2</sub>-bgc experiment. Albedo is calculated from surface upwelling and downwelling shortwave radiation assuming clear sky, which is not available from IPSL-CM6A-LR and UKESM1-0-LL in 1pctCO<sub>2</sub>-bgc experiment and from MPI-ESM1-2-LR in deforest-glob

experiment. LAI is not available from CanESM2, IPSL-CM6A-LR, UKESM1-0-LL in 1pctCO2-bgc experiment and from UKESM1-0-LL in deforest-glob experiment. Though the LAI increases in response to CO<sub>2</sub> fertilization in panel (e), the reduction in transpiration from stomatal closure dominates the total ET decline in panel (a).

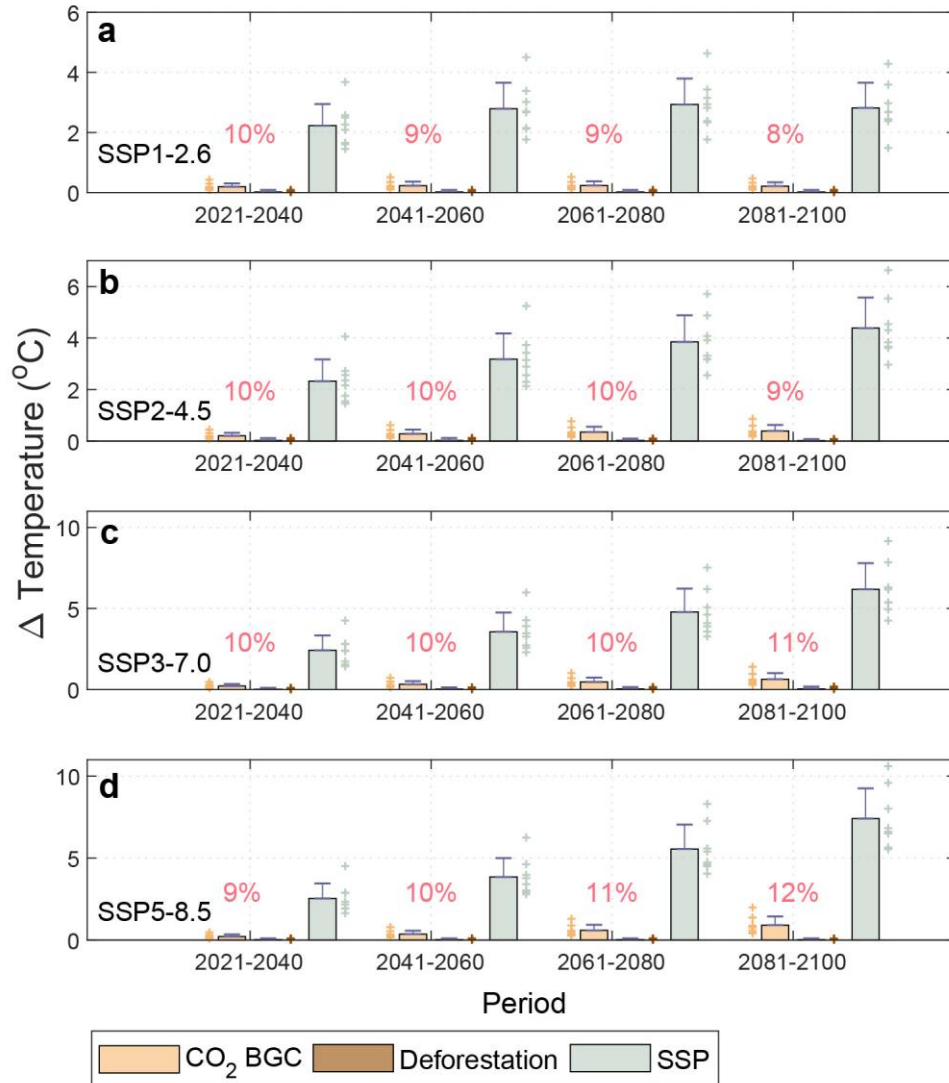

**Supplementary Fig. 6.** Same as Fig. 4 but for surface air temperature ( $^{\circ}\text{C}$ ). Each error bar indicates 1 standard deviation (SD) being added to the mean values across the CMIP6 models with available output ( $n = 8$  for  $\text{CO}_2$  physiology and SSP simulation, and  $n = 6$  for deforestation). Data point for each model has been shown along with the bar as indicated by plus sign.



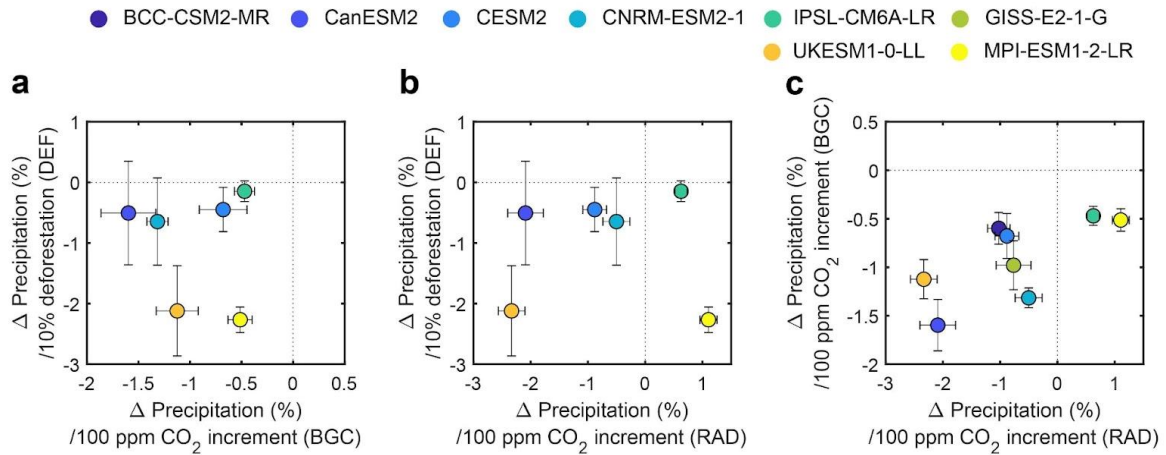

**Supplementary Fig. 7. Cross-model scatter plot showing the Amazonian precipitation response (in percent change) to deforestation, CO<sub>2</sub> physiology (BGC), and CO<sub>2</sub> radiative forcing (RAD).** The precipitation sensitivity was computed from a linear regression, in which the precipitation was regarded as a function of deforestation fraction in the LUMIP deforest-glob experiments (DEF), of CO<sub>2</sub> concentrations in the C4MIP 1pctCO<sub>2</sub>-bgc experiments (BGC), and of CO<sub>2</sub> concentrations in the C4MIP 1pctCO<sub>2</sub>-rad experiments (RAD). The error bar indicates 1 standard error (SE) being added to the regression slope by t-test against CO<sub>2</sub> in BGC ( $n = 140$ ) and RAD ( $n = 140$ ), and against deforestation in DEF ( $n = 50$ ). This analysis suggests that the deforestation effect on precipitation is largely independent of the CO<sub>2</sub> physiology effect within the set of models we evaluated, as shown in panel A. A weak relationship does exist between the strength of the precipitation response to forcing from CO<sub>2</sub> physiology and the response to forcing from CO<sub>2</sub> radiative effects (panel c;  $R = 0.70$ ;  $P = 0.05$ ).

**Table S1.** Description of each CMIP6 model used in this study.

| <b>Model</b>  | <b>Model center</b>                                        | <b>Model resolution</b>                           | <b>C4MIP<br/>ensemble<br/>number</b> | <b>LUMIP<br/>ensemble<br/>number</b> |
|---------------|------------------------------------------------------------|---------------------------------------------------|--------------------------------------|--------------------------------------|
| BCC-CSM2-MR   | Beijing Climate Center, China                              | $320 \times 160 (1.125^\circ \times 1.125^\circ)$ | 1                                    | 1                                    |
| CanESM5       | Canadian Centre for Climate Modelling and Analysis, Canada | $128 \times 64 (2.8^\circ \times 2.8^\circ)$      | 1                                    | 1                                    |
| CESM2         | National Center for Atmospheric Research, USA              | $288 \times 192 (1.25^\circ \times 0.94^\circ)$   | 1                                    | 3                                    |
| CNRM-ESM2-1   | Centre National de Recherches Météorologiques, France      | $256 \times 128 (1.4^\circ \times 1.4^\circ)$     | 4                                    | 1                                    |
| IPSL-CM6A-LR  | Institut Pierre-Simon Laplace, France                      | $144 \times 143 (2.5^\circ \times 1.27^\circ)$    | 1                                    | 3                                    |
| GISS-E2-1-G   | NASA Goddard Institute for Space Studies, USA              | $144 \times 90 (2.5^\circ \times 2^\circ)$        | 1                                    | 1                                    |
| UKESM1-0-LL   | Met Office Hadley Centre, UK                               | $192 \times 144 (1.87^\circ \times 1.25^\circ)$   | 1                                    | 1                                    |
| MPI-ESM1-2-LR | Max Planck Institute for Meteorology, Germany              | $192 \times 96 (1.9^\circ \times 1.9^\circ)$      | 3                                    | 7                                    |

**Table S2.** Regression for each model regarding the mean annual precipitation, surface relative humidity, and air temperature response to 100 ppm CO<sub>2</sub> increase via the plant physiological effects and 10% deforestation in the Amazon basin. Regression results of precipitation and air temperature response to deforestation are not applied for BCC-CSM2-MR and GISS-E2-1-G due to the unavailability of tree cover fraction output. Models without a relative humidity response to both CO<sub>2</sub> increase and deforestation are lack of available output of the relative humidity and are indicated as NA.

| Model         | Response to 100 ppm CO <sub>2</sub> increase |                               |                              | Response to 10% deforestation |                               |                              |
|---------------|----------------------------------------------|-------------------------------|------------------------------|-------------------------------|-------------------------------|------------------------------|
|               | Precipitation (%)                            | Surface relative humidity (%) | Surface air temperature (°C) | Precipitation (%)             | Surface relative humidity (%) | Surface air temperature (°C) |
| BCC-CSM2-MR   | -0.60 ± 0.16*                                | NA                            | 0.06 ± 0.01*                 | NA                            | NA                            | NA                           |
| CanESM5       | -1.60 ± 0.26*                                | -0.73 ± 0.10*                 | 0.12 ± 0.02*                 | -0.51 ± 0.85                  | -0.10 ± 0.28                  | -0.01 ± 0.06                 |
| CESM2         | -0.68 ± 0.23*                                | -0.22 ± 0.04*                 | 0.06 ± 0.01*                 | -0.45 ± 0.36                  | NA                            | 0.15 ± 0.02*                 |
| CNRM-ESM2-1   | -1.32 ± 0.10*                                | NA                            | 0.08 ± 0.01*                 | -0.65 ± 0.72                  | NA                            | 0.03 ± 0.05                  |
| IPSL-CM6A-LR  | -0.47 ± 0.10*                                | -1.25 ± 0.04*                 | 0.19 ± 0.01*                 | -0.15 ± 0.17                  | -0.32 ± 0.06*                 | 0.05 ± 0.02*                 |
| GISS-E2-1-G   | -0.98 ± 0.25*                                | NA                            | 0.11 ± 0.03*                 | NA                            | NA                            | NA                           |
| UKESM1-0-LL   | -1.12 ± 0.20*                                | -1.62 ± 0.06*                 | 0.28 ± 0.02*                 | -2.12 ± 0.74*                 | -0.22 ± 0.22                  | -0.19 ± 0.06*                |
| MPI-ESM1-2-LR | -0.51 ± 0.12*                                | -0.73 ± 0.03*                 | 0.11 ± 0.01*                 | -2.27 ± 0.21*                 | -1.14 ± 0.07*                 | 0.10 ± 0.02*                 |

\* indicate a significance level of  $P < 0.05$  for regression coefficients computed to represent the climate response to rising CO<sub>2</sub> and deforestation fraction.

**Table S3.** Future projection in Amazonian precipitation (%) by 2081-2100 under four different Shared Socioeconomic Pathways (SSP) for each model used in this study. The relative precipitation is calculated as the mean precipitation during 2081-2100 as compared to the climatological precipitation from the pre-industrial levels (i.e., 1850).

| Model name    | SSP1-2.6 | SSP2-4.5 | SSP3-7.0 | SSP5-8.5 |
|---------------|----------|----------|----------|----------|
| BCC-CSM2-MR   | -11.72   | -13.61   | -17.81   | -20.43   |
| CanESM2       | -15.97   | -23.01   | -29.41   | -29.81   |
| CESM2         | -4.50    | -6.01    | -13.12   | -16.25   |
| CNRM-ESM2-1   | 0.35     | -1.00    | -7.62    | -11.14   |
| IPSL-CM6A-LR  | 4.33     | 2.39     | 3.86     | 3.12     |
| GISS-E2-1-G   | -7.24    | -11.24   | -22.16   | -10.09   |
| UKESM1-0-LL   | -8.58    | -11.56   | -18.00   | -19.01   |
| MPI-ESM1-2-LR | 8.23     | 1.96     | 1.12     | -5.58    |
